# Supplementary material for: Functional Analysis and Tissue-Specific Expression of Calcitonin and CGRP with RAMP-Modulated Receptors CTR and CLR in Chickens
Source: MDPI journal article supplement (doi:10.3390/ani14071058), 2024-03-30
Supplement: s1 [file s1]

**Supplemental Table S1: Primers used in this study.**

| Gene         | Sense/antisense | Primer sequence (5'-3')                            |
|--------------|-----------------|----------------------------------------------------|
| <i>CTR</i>   | Sense           | TGGTGAATTTCGCCACCATGAAAAAACAACCCACAG               |
|              | Antisense       | GCTGGATATCTGCAGAATTCCTAGGCTGATGTCTCCCA             |
| <i>CLR</i>   | Sense           | TGGTGAATTTCGCCACCATGACAAAAAAGTGGATCAC              |
|              | Antisense       | GCTGGATATCTGCAGAATTCCTACACTGTCATGTCAT              |
| <i>RAMP1</i> | Sense           | TTGGTACCGAGCTCGGATCCGCCACCATGGCCCTGCTGCCGCGCCGCTTC |
|              | Antisense       | TGCTGGATATCTGCAGAATTCCTCACTGCCACCAGCATCCCCAGGT     |
| <i>RAMP2</i> | Sense           | TTGGTACCGAGCTCGGATCCGCCACCATGGCACCGTGTGCGCAGATGG   |
|              | Antisense       | GCTGGATATCTGCAGAATTCCTAAGGCTGTGCCTTGCCGT           |
| <i>RAMP3</i> | Sense           | TGGTGAATTTCGCCACCATGGAGGCGTCCGGCCGCTGCC            |
|              | Antisense       | GTGGATCCATTGGGAACAACCTACCCTAGAATATCACTTC           |

All primers were synthesized by Youkang Biotechnology (Chengdu, China)
